# Supplementary material for: Histopathological correlations and fat replacement imaging patterns in recessive limb‐girdle muscular dystrophy type 12
Source: PubMed Central journal article supplement — J Cachexia Sarcopenia Muscle. 2023 Apr 20;14(3):1468–81. doi: 10.1002/jcsm.13234 (PMC10235862; doi:10.1002/jcsm.13234), 2023-04-20

**Rectus femoris**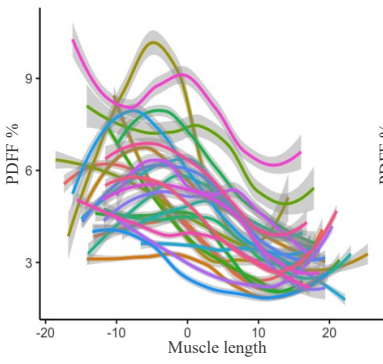**Vastus medialis**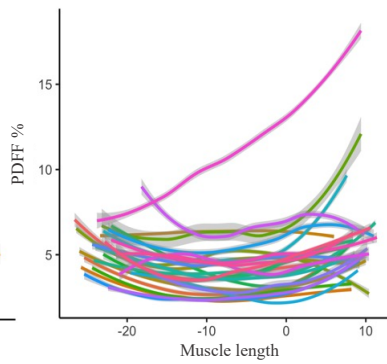**Vastus intermedius**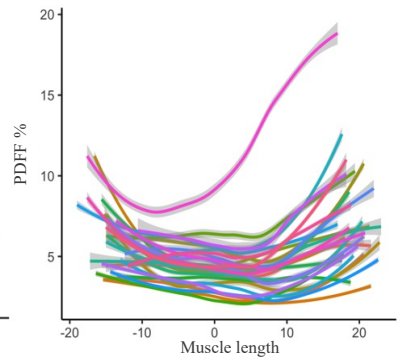**Tensor fascia lata**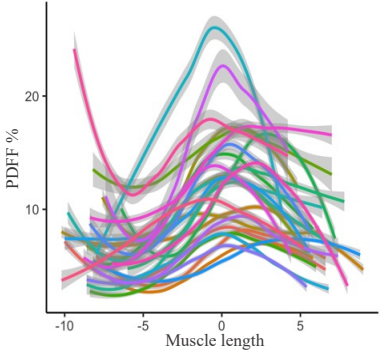**Pectineus**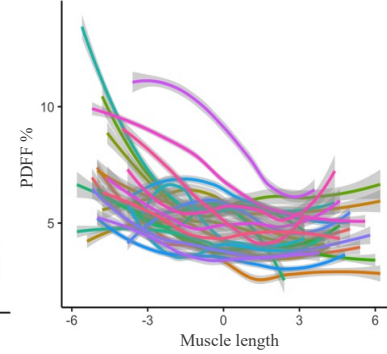**Adductor Brevis**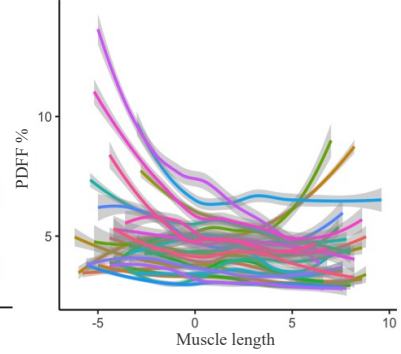**Adductor Longus**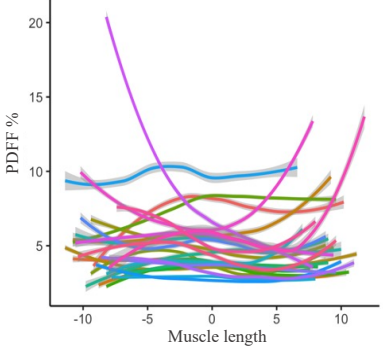**Gracilis**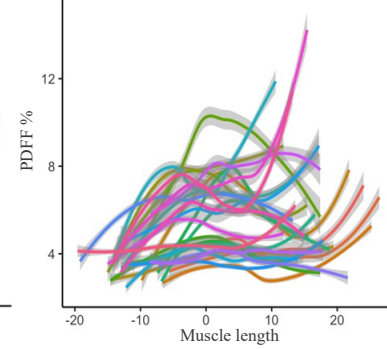**Biceps femoris long head**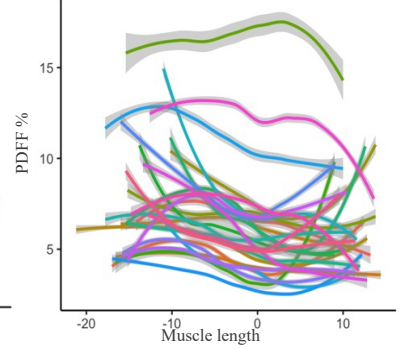**Biceps femoris short head**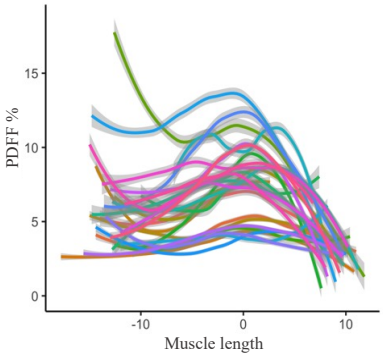**Semitendinosus**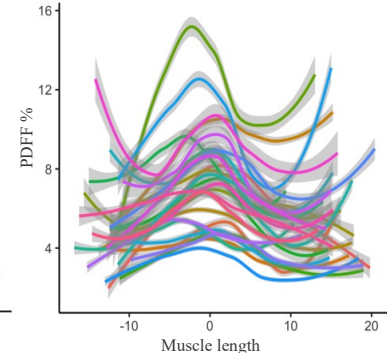**Gluteus maximus**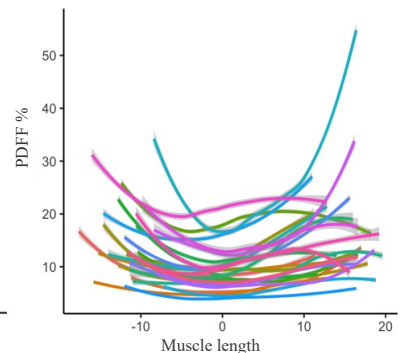**Gluteus medius**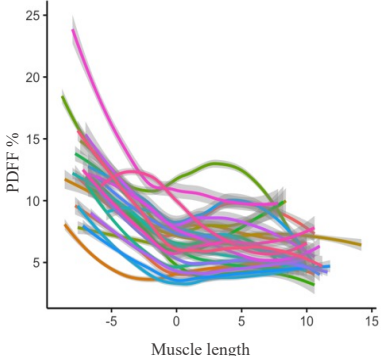**Gluteus minimus**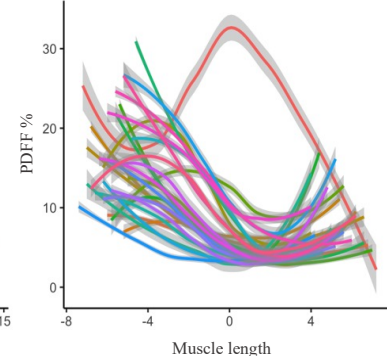**Total muscles**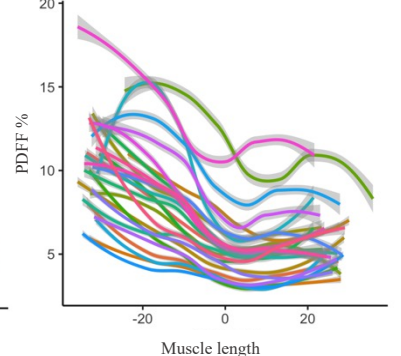**Quadriceps group**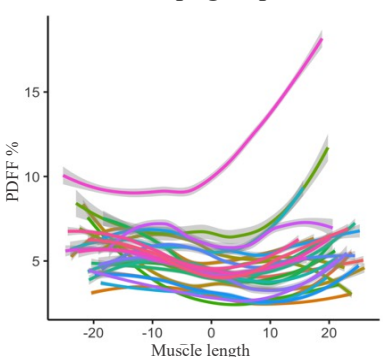**Adductor group**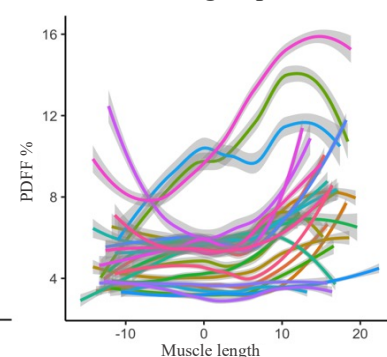**Hamstrings group**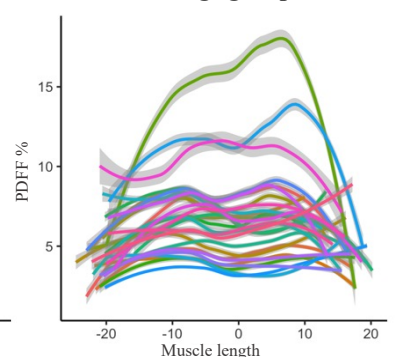

Supplement: JCSM-14-1468-s002.pdf [file JCSM-14-1468-s002.pdf]
