# Supplementary figures and images for: Histopathological correlations and fat replacement imaging patterns in recessive limb‐girdle muscular dystrophy type 12
Source: PubMed Central journal article supplement — J Cachexia Sarcopenia Muscle. 2023 Apr 20;14(3):1468–81. doi: 10.1002/jcsm.13234 (PMC10235862; doi:10.1002/jcsm.13234), 2023-04-20

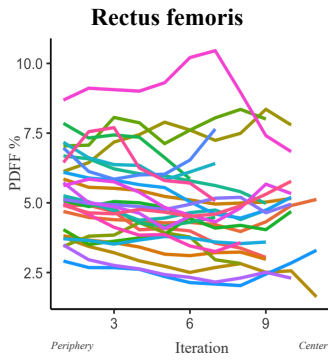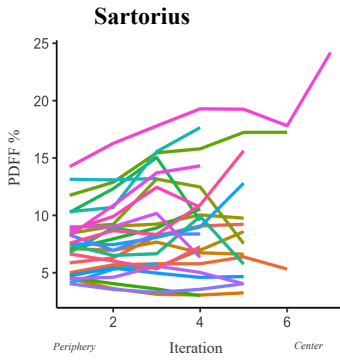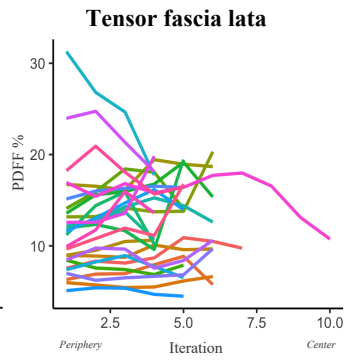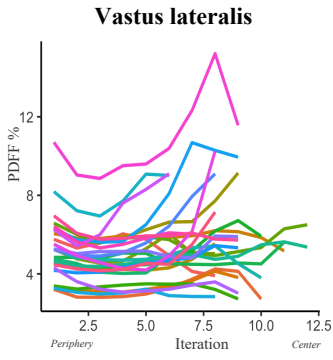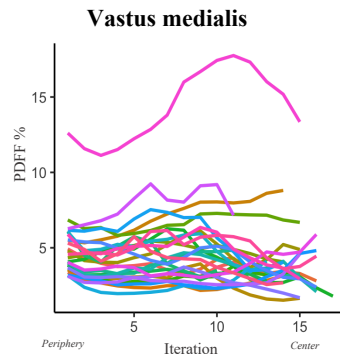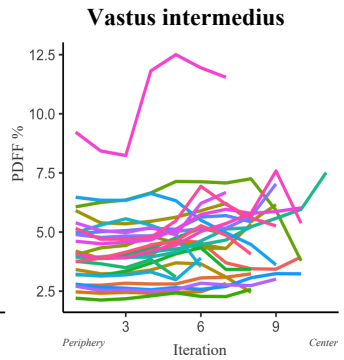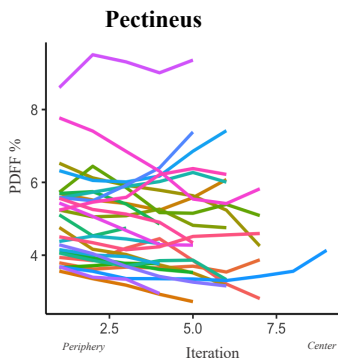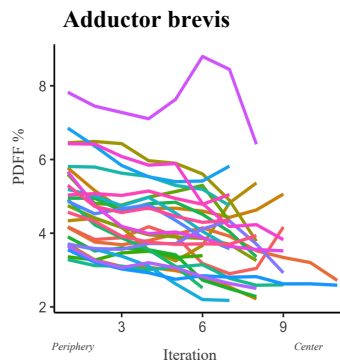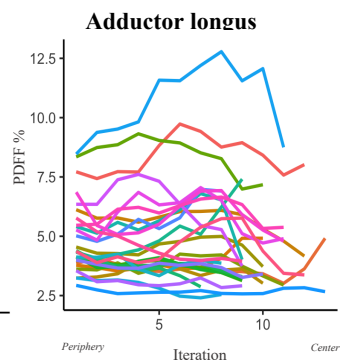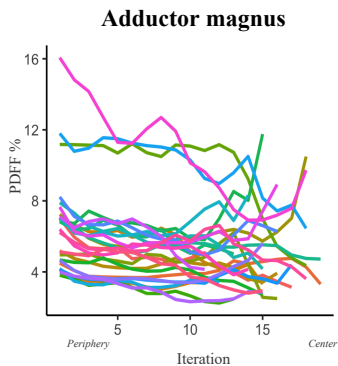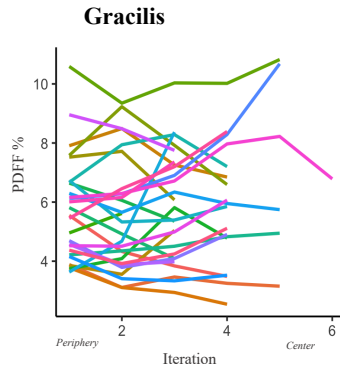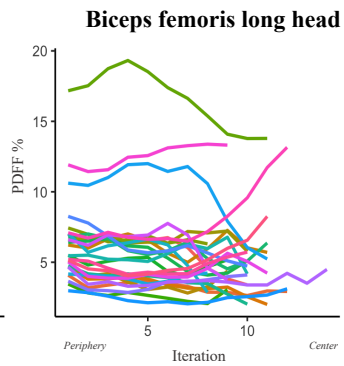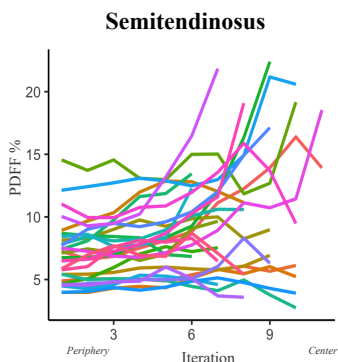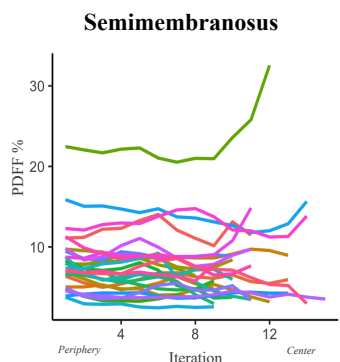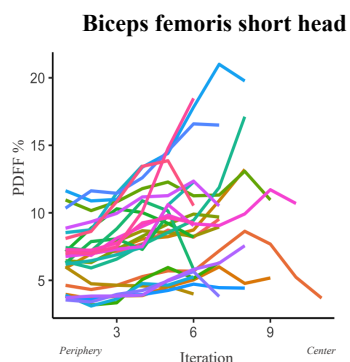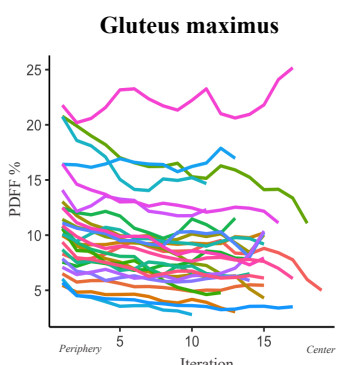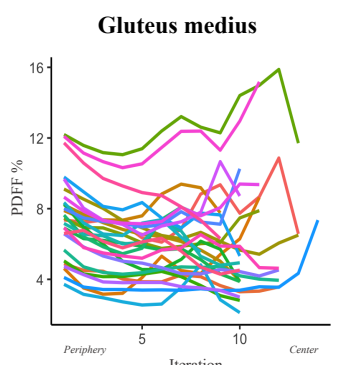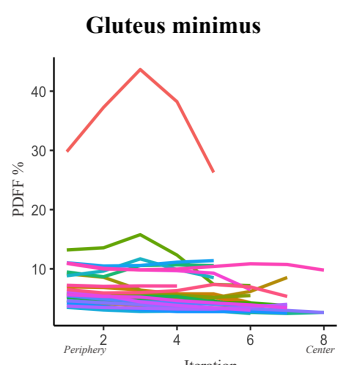

Supplement: JCSM-14-1468-s005.pdf [file JCSM-14-1468-s005.pdf]

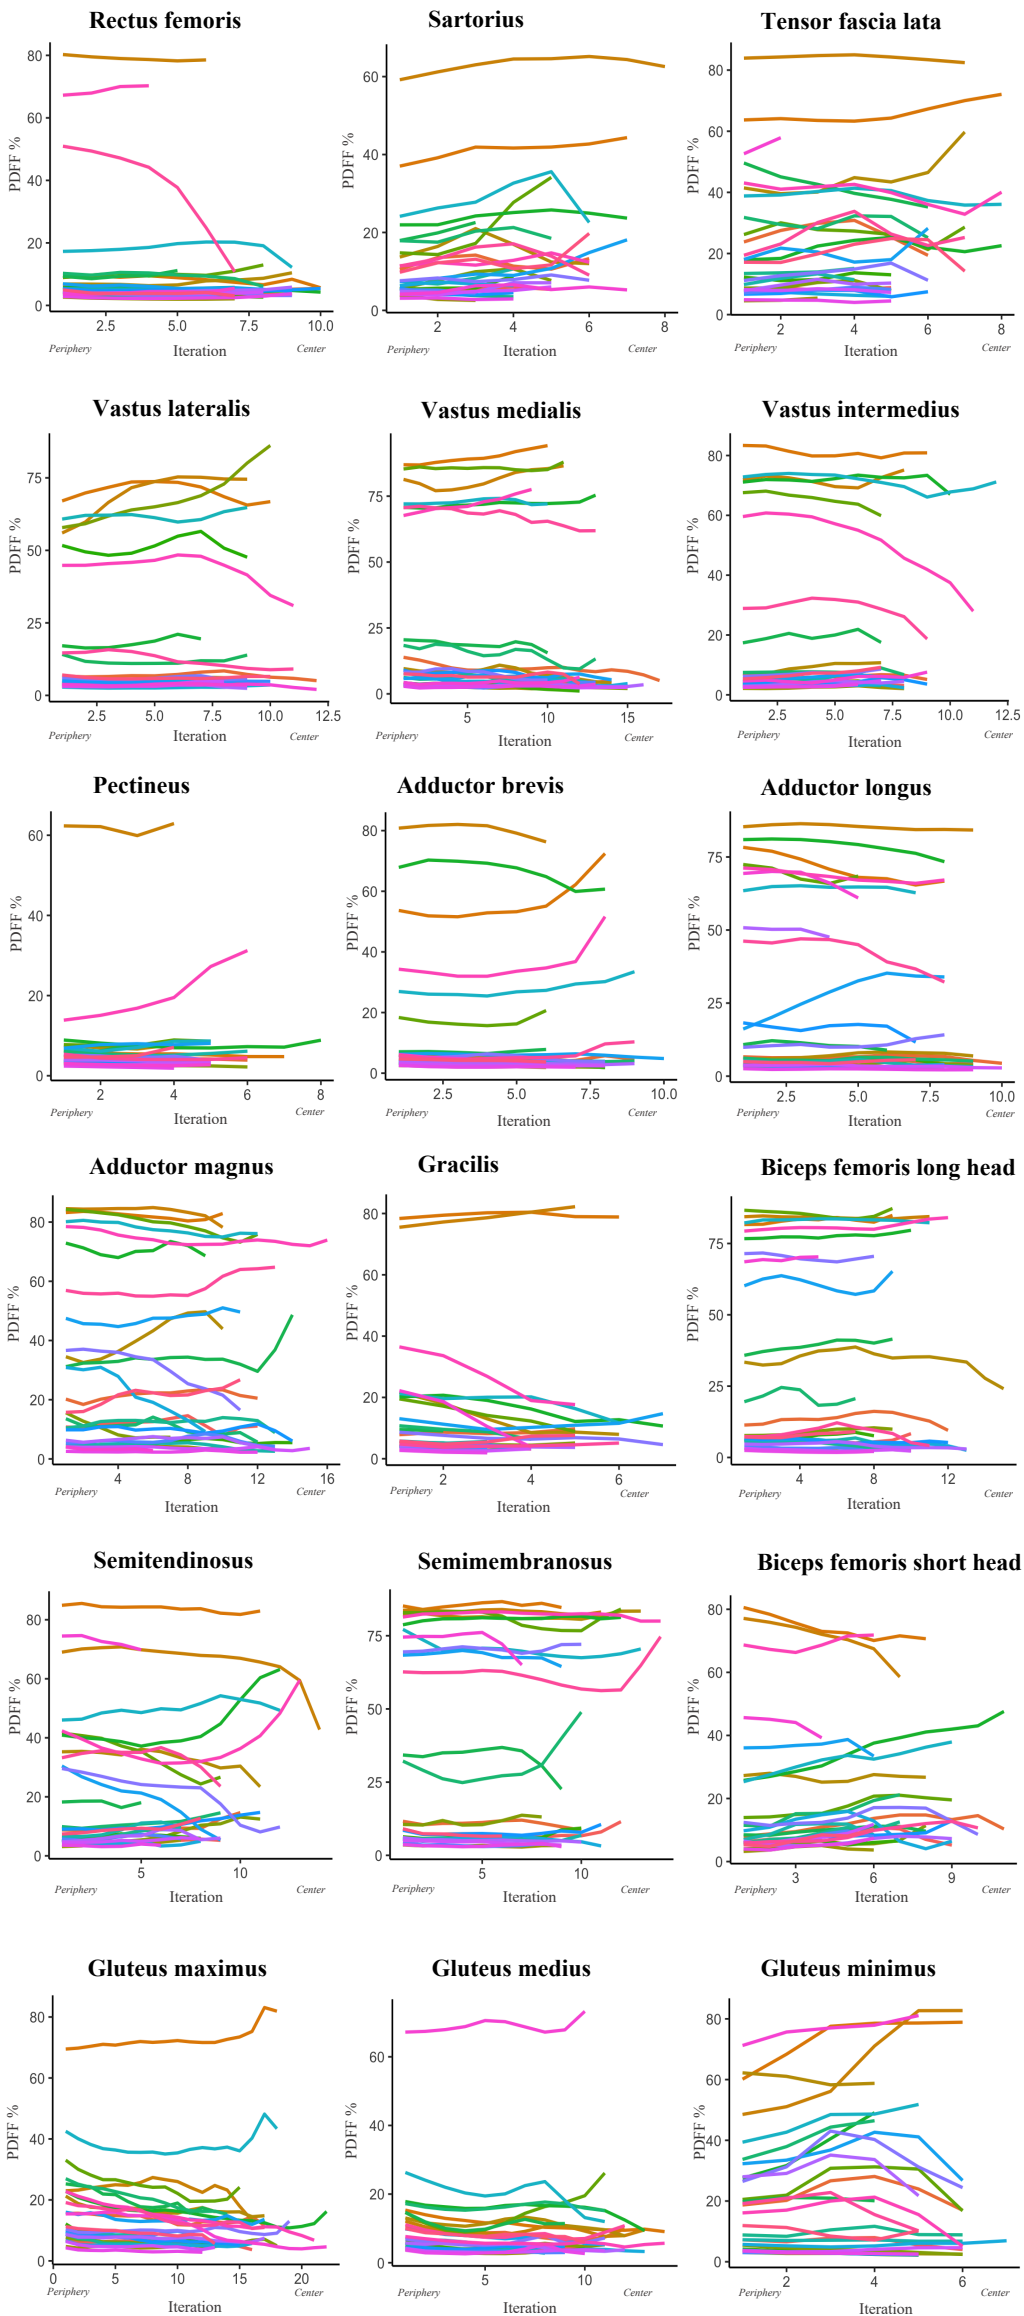

Supplement: JCSM-14-1468-s006.pdf [file JCSM-14-1468-s006.pdf]

### Patients

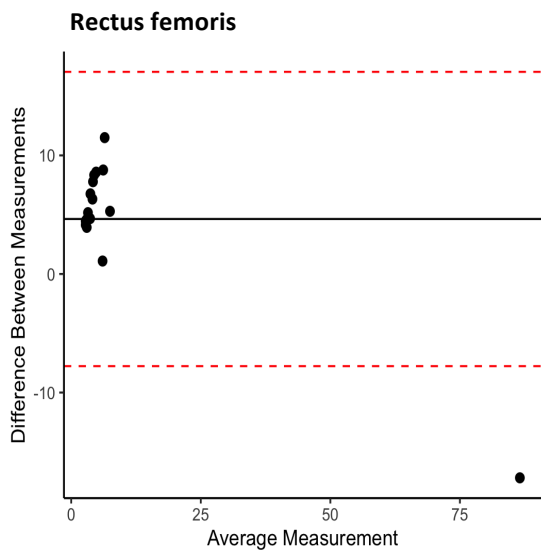

### Controls

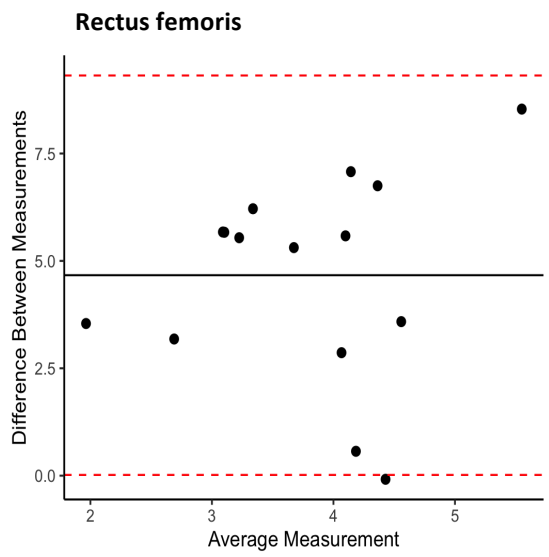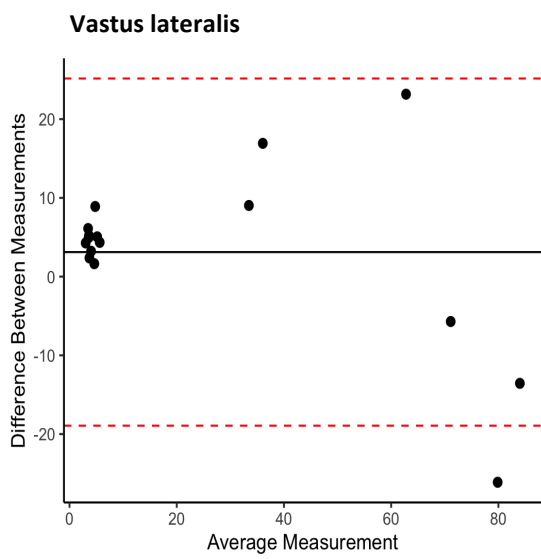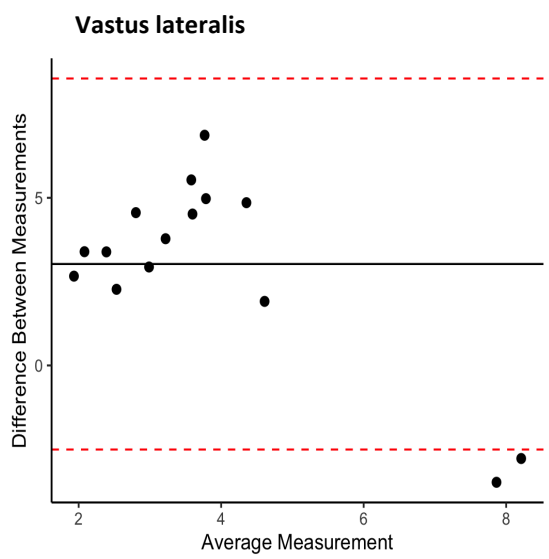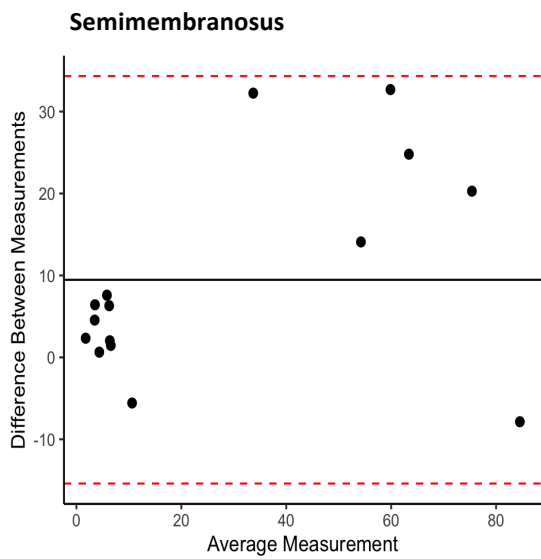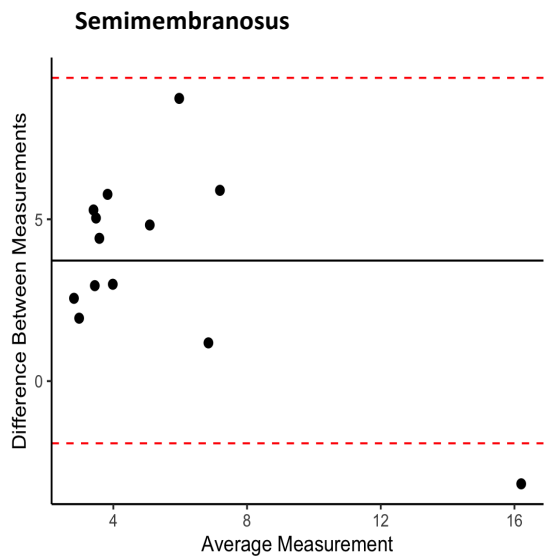

Supplement: JCSM-14-1468-s007.pdf [file JCSM-14-1468-s007.pdf]
